# Supplementary material
Source: Research Square preprint supplement (doi:10.21203/rs.3.rs-9212443/v1)
Supplement: Supplementary file 1 [file 74d99391eac78f3d164f01d6.pdf]

# 失能老人整合性照护现状及需求的影响因素研究

陈海荣, 高学莉, 刘溢思\*

**【摘要】目的** 了解失能老人的整合性照护服务现状、需求和影响因素,为构建失能老人整合性照护体系提供理论依据。**方法** 采用自行设计的失能老人整合性照护需求调查表对北京市3所三级甲等医院及2个社区照护中心的198例失能老人进行问卷调查。**结果** 社区目前尚未开展整合性照护服务,198例失能老人6类整合性照护服务需求均分排在前3位为基础护理(2.89±0.39)分、健康指导(2.89±0.37)分和专科医疗护理(2.88±0.40)分。多元线性回归分析显示,居住方式、经济来源、医疗保险月自付投入、医疗费用负担超过40%、如医疗保险不报销仍需专业护理人员上门服务、失能程度是主要影响因素( $P<0.01$ )。**结论** 失能老人对整合性照护服务需求高,以基础护理、专科医疗护理、健康指导的需求程度最高,以精神慰藉的需求程度最低。提示相关管理部门可通过社区了解失能老人的整合性照护服务实际需求,构建整合性照护服务体系,以满足失能老人的迫切需求。

**【关键词】**失能老人;整合性照护;居家护理;照护需求;影响因素

中图分类号:R473 文献标识码:A DOI:10.3969/j.issn.1671-315x.2022.08.003

Study on the status, demands and its influencing factors of integrated care among the disabled elderly/CHEN Hairong, GAO Xueli, LIU Yisi // Journal of Nursing Administration, -2022, 22(8):544.

School of Nursing, Capital Medical University, Beijing 100069, China

**【Abstract】Objective** To understand the status, demands and influencing factors for integrated care among the disabled elderly and to provide a theoretical basis for the construction of integrated care system for the disabled elderly. **Methods** A self-designed integrated care needs questionnaire was used to investigate 198 disabled elderly from 3 Class III Grade A hospitals and 2 community care centers in Beijing. **Results** At present, integrated care services have not been carried out in the community. The top three of the six types of integrated care service demands in 198 disabled elderly patients were basic care needs scoring (2.89±0.39), health guidance scoring (2.89±0.37) and specialized medical care scoring (2.88±0.40). Multiple linear regression analysis showed that the main influencing factors were residence mode, economic source, monthly out-of-pocket medical insurance investment, medical expense burden more than 40%, the need for home service of professional nursing staff if medical insurance was not reimbursed, and the degree of disability ( $P<0.01$ ). **Conclusion** The disabled elderly have a high demand for integrated care services, with the highest demand for basic care, specialized medical care and health guidance, and the lowest demand for spiritual comfort. It is suggested that the relevant management departments can understand the actual needs of integrated care services for the disabled elderly through the community, and build an integrated care service system to meet the urgent needs of the disabled elderly.

**【Key words】**the disabled elderly; integrated care; home care; care demand; influencing factor

研究显示,我国失能、半失能老人4400万,预计2050年失能老人将达到7000万<sup>[1-2]</sup>。随着失能老人的增加,人们的需求已由对急性疾病的诊断治疗延伸至预防和控制由失能及慢性病引发的生理和心理失能的调适和支持,照护服务随之由急性医疗照护延伸至长期照护及社区照护<sup>[3]</sup>。目前我国已形成居家照护机构、长期照护机构和社区照护机构及医养结合机构的片段化养老模式,但各机构之间彼此不协调、相互竞争,资源和服务碎片化,提供重复服务问题凸显<sup>[3-7]</sup>。整合性照护是以人的需求为核心,跨时间及不同照护体系,使服务对象得到预防、治疗及康复的连续、无缝衔接的照料服务<sup>[5-6]</sup>。WHO指出整合性照护可以有效解决照护体系的片段性、服务不均匀性、不同照护体系之间的衔接和照护的可及性问题及失控的医疗照护费用问题,并减少不必要的急诊、再入

院和机构照顾<sup>[6]</sup>。如今整合性照护已是西方各国解决失能老人照护的核心战略<sup>[6,8]</sup>。在我国,仅少数学者从理论层面论述了整合性照护的概念和运行路径,缺乏实践探索,适合我国国情的整合性照护模式尚处于探索初期,失能老人整合性照护的需求尚不清楚<sup>[9]</sup>。本研究旨在调查失能老人的整合性照护需求,为我国构建失能老人整合性照护体系提供借鉴。

## 1 对象与方法

### 1.1 研究对象

2019年2月至2021年2月,选取北京市3所三级甲等医院及2所社区照护中心的198例失能老人为研究对象。纳入标准:①年龄≥60岁;②自理能力受损的老人;③被照顾时间≥6个月;④自愿参加本研究。排除标准:①意识障碍者;②无法沟通者。根据样本量粗略估计法,取变量数的5~10倍,考虑15%的样本量遗失和无效问卷,最终确定样本量为198。

### 1.2 方法

#### 1.2.1 研究工具

1.2.1.1 失能老人一般资料问卷 自行设计问卷,包

基金项目:北京市教育委员会科技计划项目(SM202110025004)

工作单位:100069,北京市,首都医科大学护理学院

作者简介:陈海荣(1998-),女,山西吕梁人,硕士研究生在读,主要从事老年护理、癌症康复护理研究。

\*通信作者:刘溢思, E-mail: liuyisi@ccmu.edu.cn

括:性别、长期居住城市、户籍类型、居住方式、子女回家看望频率、主要照顾者、经济来源、医疗费用支付方式、医疗保险自付投入、居民医疗费用负担超过40%<sup>[10]</sup>(居民医疗费用负担=居民现金卫生支出/家庭可支配收入×100%,当这一比例超过40%时,表明这个家庭承受着沉重的医疗负担<sup>[10]</sup>)、如医疗保险不报销是否需要专业护理人员上门服务、失能程度、慢性病患数量。

**1.2.1.2 失能老人整合性照护需求调查表** 在文献回顾<sup>[11-13]</sup>和研究团队研讨基础上,经5名高级职称的老年照护专家函询,形成问卷初稿。对20例失能老人预调查并根据反馈结果修订,形成最终版。包括整合性照护现状及整合性照护需求两个部分。

**1.2.1.2.1 整合性照护现状** 包括4个选择题,其中1、3、4为多项选择题,2为单项选择题。①多项选择题:题1:您所在社区提供的整合性照护服务您知晓哪些?(如评估您的健康状况、根据评估结果提供您的照护计划、链接照护服务资源如医院急诊和社区康复中心、定期随访;回答均为不知晓时,判定所在社区未提供整合性照护服务);题3:您所在社区提供以下资源和帮助中,您知晓哪些?(如社区老人长期照护中心、社区卫生服务中心提供免费的老人体检服务、社区老人日间照护中心、志愿者服务和社区护士或其他专业人士提供上门居家照护服务);题4:您接受过的专业人士上门提供的居家照护服务(如理发、洗头、皮肤护理、送餐、翻身、压疮护理、协助洗澡沐浴、帮助服药、留置尿管护理或一次性导尿、大便失禁护理、胃管护理、肌肉注射用药和静脉输液)。②单项选择题:题2:您是否知道所在社区可以提供照护资源和帮助。

**1.2.1.2.2 整合性照护需求** 包括整合性照护服务功能需求、内容需求。①整合性照护功能需求包括:是否需要社区建立一个整合性服务窗口以免免费获知老人照护的所有资源、办理程序等及您认为社区老人照护资源的整合性窗口应该具备的功能(多项选择题,如评估健康状况、拟订照护计划、链接服务如医院急诊和社区康复中心、联络照护资源、定期随访)。②整合性照护服务内容需求包括:基础护理(11个条目)、健康指导(21个条目)、专科医疗护理(15个条目)、社会参与(3个条目)、精神慰藉(7个条目)和日常生活照料(20个条目)6个维度,共77个条目。每个条目采用Likert 5级评分法,“非常不需要”计1分,“不太需要”计2分,“无所谓”计3分,“比较需要”计4分,“非常需要”计5分。得分范围为77~385分,得分77~160分、161~243分、244~385分分别为需求程度低、中等和高。问卷内容效度为0.983, Cronbach's  $\alpha$  系数为0.901。

**1.2.2 调查方法** 课题负责人调查前统一培训问卷调查员,规范指导用语。①住院患者调查,调查前课题负责人在征得医院护理部和科室同意后,调查员进入病房根据纳入和排除标准选择老年患者;②社区患者调查,调查员在调查前获得患者和家属同意后进行调查。填写问卷前调查员向失能老人介绍整合性照护服务的目的及意义,告知问卷填写注意事项并解答不理解的条目;不能自行填写的失能老人,由调查员根据失能老人回答填写问卷。共发放问卷198份,回收有效问卷198份,有效回收率为100%。

**1.2.3 统计学方法** 采用SPSS 22.0统计软件包进行数据录入和分析。计数资料采用频率、构成比描述;计量资料采用均数、标准差描述,不同特征的失能老人整合性照护需求的得分比较采用 $t$ 检验或单因素方差分析;失能老人整合性照护需求的影响因素采用多元线性回归分析。

## 2 结果

### 2.1 失能老人的一般资料

198例失能老人来自医院142例、来自社区56例,年龄60~100(75.91±9.39)岁。其他具体情况见表1。

### 2.2 失能老人整合性照护现状

本研究中的2个社区( $n=56$ )结果显示,目前社区尚未开展整合性照护服务,已提供的照护资源和服务见表2。

### 2.3 失能老人整合性照护服务需求

**2.3.1 失能老人整合性照护服务功能需求**(见表3)

**2.3.2 失能老人整合性照护服务内容需求** 198例失能老人6类整合性照护服务需求由高到低依排序依次为基础护理、健康指导、专科医疗护理、社会参与、日常生活照料和精神慰藉;整合性照护需求得分和6类护理需求排名前3的条目及得分见表4。不同特征失能老人整合性照护服务内容需求得分比较见表5。

### 2.4 失能老人整合性照护服务需求影响因素

以失能老人整合性照护服务内容需求得分均值为因变量,以单因素分析中 $P \leq 0.2$ 的变量为自变量进行多元线性回归分析。自变量赋值方式见表6,多元线性回归分析结果见表7。

## 3 讨论

### 3.1 社区尚未开展整合性照护服务

本研究表2显示,社区尚未开展整合性照护服务,已开展的照护服务以生活护理为主,与伟松<sup>[14]</sup>和王洋等<sup>[15]</sup>研究一致,其研究均指出,我国整合性照护服务仍处在理论研究阶段,尚无社区开展或试点此项服务。社区目前所提供的照护服务以机构照护及体检为主,而对于居家护理服务大部分老人并不知晓,可能与研究社区对居家护理服务的宣传不到位有关。

目前社区提供的护理服务项目以理发、洗头等生活护理为主,并未开展输液等有创护理,跟医疗相关的护理服务也很少见。分析原因:①在居民家中开展医疗相关护理服务有一定安全风险,如输液等有创护理操作要求一定的无菌条件,居民住所很难满足,患者有感染的风险。②居民居住地址均为非护士执业注册地点,且无监控设备,发生纠纷护士举证维权困难重重<sup>[16-17]</sup>。③我国缺乏相关激励机制鼓励社区护士开展居家护理服务项目,因此社区护士积极性不高、内在驱动力不强<sup>[18]</sup>。④居家护理服务项目的收费普遍较低,收费标准尚不统一<sup>[18]</sup>。因此,社区应加大对居家照护服务的宣传力度,合理增加医疗护理服务项目。

表1 失能老人一般资料(n=198)

| 项目                    | 例数(n) | 百分比(%) |
|-----------------------|-------|--------|
| 性别                    |       |        |
| 男性                    | 99    | 50.00  |
| 女性                    | 99    | 50.00  |
| 长期居住城市                |       |        |
| 北京                    | 169   | 85.35  |
| 外埠                    | 29    | 14.65  |
| 户籍类型                  |       |        |
| 农业户                   | 35    | 17.68  |
| 非农业户                  | 163   | 82.32  |
| 居住方式                  |       |        |
| 养老机构                  | 51    | 25.76  |
| 独居或与他人共同居住            | 147   | 74.24  |
| 子女回家看望频率(周/次)         |       |        |
| <1                    | 70    | 35.35  |
| 1~4                   | 57    | 28.79  |
| >4                    | 71    | 35.86  |
| 主要照顾者                 |       |        |
| 养老院护理员                | 52    | 26.26  |
| 家人                    | 133   | 67.17  |
| 保姆或无人照顾               | 13    | 6.57   |
| 经济来源                  |       |        |
| 自己工资                  | 152   | 76.77  |
| 政府救助、子女赡养费及其他         | 46    | 23.23  |
| 医疗费用支付方式              |       |        |
| 城镇职业基本医疗保险            | 72    | 36.36  |
| 城镇居民基本医疗保险            | 99    | 50.00  |
| 新型农村合作医疗保险及其他         | 27    | 13.64  |
| 医疗保险自付投入(元/月)         |       |        |
| 0~500                 | 98    | 49.49  |
| 501~1 000             | 48    | 24.24  |
| 1 001~2 000           | 34    | 17.17  |
| >2 000                | 18    | 9.09   |
| 居民医疗费用负担超过40%         |       |        |
| 否                     | 62    | 31.31  |
| 是                     | 136   | 68.69  |
| 如医疗保险不报销是否需专业护理人员上门服务 |       |        |
| 是                     | 60    | 30.30  |
| 否                     | 138   | 69.70  |
| 失能程度                  |       |        |
| 轻中度                   | 158   | 79.80  |
| 重度                    | 40    | 20.20  |
| 慢性病患病数量(n)*           |       |        |
| ≤1                    | 27    | 13.64  |
| 2                     | 99    | 50.00  |
| ≥3                    | 72    | 36.36  |

注:\*包括:呼吸系统疾病、心血管系统疾病等

政府也亟需出台相关政策,规范护理服务项目的开展,鼓励并保障居家照护服务事业的顺利发展<sup>[19]</sup>。

### 3.2 失能老人整合性照护需求

**3.2.1 失能老人整合性照护服务功能需求以评估、拟订照护计划和链接服务资源为主** 本研究表3显示,95.45%的失能老人需要在社区建立整合性照护服务窗口,并希望其具备拟订照护计划、评估和链接服务如医院急诊及社区康复中心、联络照护资源和随访的功能。黄文杰等<sup>[20]</sup>研究发现,有73.4%的调查对象愿意尝试整合照护式养老。老人对整合性照护服务窗口的高需求主要与老人照护资源碎片化现状有关<sup>[4-7]</sup>。现有的照护机构供给服务重叠,资源碎片化,彼此之间缺乏有效连接和转介机制,导致医疗资源利

表2 失能老人社区整合性照护现状(n=56)

| 项目                     | 例数(n) | 百分比(%) |
|------------------------|-------|--------|
| 所在社区提供以下整合性照护服务*       |       |        |
| 评估您的健康状况               | 0     | 0.00   |
| 根据评估结果提供您的照护计划         | 0     | 0.00   |
| 链接照护服务资源如医院急诊、社区康复中心   | 0     | 0.00   |
| 定期随访                   | 0     | 0.00   |
| 是否知道所在社区可以提供照护资源和帮助    |       |        |
| 是                      | 38    | 67.86  |
| 否                      | 8     | 14.29  |
| 不知道                    | 10    | 17.86  |
| 所在社区提供以下资源和帮助中,您知晓哪些?* |       |        |
| 社区老人长期照护中心服务           | 38    | 67.86  |
| 社区卫生服务中心提供免费的老人体检服务    | 33    | 58.93  |
| 社区老人日间照护中心服务           | 30    | 53.57  |
| 志愿者服务                  | 30    | 53.57  |
| 社区护士或其他专业人士提供上门居家照护服务  | 27    | 48.21  |
| 您接受过的专业人士上门提供的居家照护服务*  |       |        |
| 理发                     | 46    | 82.14  |
| 洗头                     | 25    | 44.64  |
| 皮肤护理                   | 22    | 39.29  |
| 送餐                     | 22    | 39.29  |
| 翻身                     | 20    | 35.71  |
| 压疮护理                   | 20    | 35.71  |
| 协助洗澡沐浴                 | 20    | 35.71  |
| 帮助服药                   | 19    | 33.93  |
| 留置尿管护理或一次性导尿           | 19    | 33.93  |
| 大便失禁护理                 | 13    | 23.21  |
| 胃管护理                   | 3     | 5.36   |
| 肌内注射用药                 | 0     | 0.00   |
| 静脉输液                   | 0     | 0.00   |

注:\*为多项选择

表3 失能老人整合性照护服务功能需求(n=198)

| 项目                                    | 例数(n) | 百分比(%) |
|---------------------------------------|-------|--------|
| 是否需要社区建立一个整合性服务窗口以免费获知老人照护的所有资源、办理流程等 |       |        |
| 是                                     | 189   | 95.45  |
| 否                                     | 9     | 4.55   |
| 您认为社区老人照护资源的整合性服务窗口应具备的功能             |       |        |
| 评估健康状况                                | 182   | 91.92  |
| 拟订照护计划                                | 183   | 92.42  |
| 链接服务如医院急诊、社区康复中心                      | 178   | 89.90  |
| 联络照护资源                                | 181   | 91.41  |
| 定期随访                                  | 170   | 85.86  |

用率低下和寻求照护服务流程复杂<sup>[4-7]</sup>,失能老人及其家属不知该如何快速寻求服务,因而对整合性照护服务具有较高期望。因此政府应从政策层面上考虑如何在社区设立整合性照护服务窗口,在实践中不断探索满足失能老人实际需求的整合性照护模式。

**3.2.2 失能老人整合性照护服务内容需求以基础护理、健康指导、专科护理最强烈,以精神慰藉需求最低** 本研究结果表4显示,失能老人整合性照护服务内容需求排在前3位的需求类别为基础护理、健康指导、专科医疗护理,排在后3位的需求类别为社会参与、日常生活照料、精神慰藉。这表明失能老人对照护服务的需求集中在疾病相关的基础护理、专科护理及健康指导,与张洪等<sup>[21]</sup>研究结果一致。而吴芳琴等<sup>[22]</sup>发现失能老人对身体照料和日常生活照料需求较高,可能与研究对象失能程度构成比有关。本研究中,重度失能老人比例为20.20%,低于吴芳琴研究<sup>[22]</sup>的58%,故对日常生活照料的需求可能较低。在专科护理需求中,失能老人对保持呼吸道通畅的需求程度最高,主要体现在提供雾化吸入、提供吸氧、协助有效排痰等3个条目。原因可能是:①失能老人呼吸系统疾病患病率较高<sup>[23]</sup>,该类疾病受季节影响易反复发作,且病程长、难治愈,主要表现为咳嗽咳痰等呼吸不畅

**表4 失能老人整合性照护服务内容需求各维度条目得分排名前3位条目得分(n=198)**

| 项目                               | 得分(分, $\bar{x} \pm s$ ) |
|----------------------------------|-------------------------|
| 基础护理                             | 2.89±0.39               |
| 提供定期体格检查(肝功能/肾功能/血糖/血脂/尿常规/心电图等) | 3.43±1.57               |
| 提供注射给药                           | 3.31±1.41               |
| 提供定期生命体征检测(体温/脉搏/呼吸/血压等)         | 3.27±1.57               |
| 健康指导                             | 2.89±0.37               |
| 提供给药指导                           | 3.54±1.32               |
| 提供氧疗知识指导                         | 3.52±1.35               |
| 提供老年常见慢性病预防指导(糖尿病/冠心病/骨质疏松等)     | 3.25±1.31               |
| 专科医疗护理                           | 2.88±0.40               |
| 提供雾化吸入                           | 3.75±1.26               |
| 提供吸氧                             | 3.51±1.34               |
| 协助有效排痰                           | 3.41±1.30               |
| 社会参与                             | 2.84±0.22               |
| 参与学习活动                           | 3.02±1.38               |
| 参与娱乐休闲活动(棋牌/唱歌/跳舞等)              | 2.97±1.33               |
| 参与社会活动(志愿者/宗教活动/科普宣教/咨询等)        | 2.53±1.13               |
| 日常生活照料                           | 2.65±0.29               |
| 协助户外活动(回家/购物/到上级医院就医等)           | 3.19±1.54               |
| 协助移动(翻身/起卧/行走/上下楼梯等)             | 3.18±1.43               |
| 准备饭菜                             | 2.93±1.44               |
| 精神慰藉                             | 2.55±0.31               |
| 陪同读书、看报、看电视、听广播服务                | 3.04±1.49               |
| 陪伴、聊天                            | 2.95±1.42               |
| 提供重要节日问候或庆祝活动                    | 2.57±1.18               |
| 整合性照护服务需求总均分                     | 2.81±0.42               |

的症状,故老人对保持呼吸道通畅方面的需求程度更高。在健康指导方面,失能老人对给药、氧疗知识和慢性病预防指导的需求程度较高。②失能老人合并多种慢性病,绝大多数(86.36%)失能老人患有不少于2种慢性病,多种慢性病共存使老人需长期服用多种药物,对用药知识比较缺乏<sup>[24-25]</sup>,药物的用法用量、不良反应等都亟需专业指导。失能老人呼吸系统疾病患病率较高,氧疗是呼吸系统疾病常见的治疗方法,且氧疗知识复杂,因此失能老人对氧疗知识指导需求程度高<sup>[23,26]</sup>。③慢性病遇诱因易急性发作,故老人对于如何避免诱因预防慢病急性发作、控制疾病进展的健康指导需求强烈。本研究中,得分最低的整合性

**表5 不同特征失能老人整合性照护服务内容需求得分比较(n=198)**

| 项目                    | 得分(分, $\bar{x} \pm s$ ) | t/F值   | P值    |
|-----------------------|-------------------------|--------|-------|
| 性别                    |                         |        |       |
| 男性                    | 2.77±0.41               | -1.293 | 0.197 |
| 女性                    | 2.84±0.43               |        |       |
| 长期居住城市                |                         |        |       |
| 北京                    | 2.78±0.42               | -2.145 | 0.033 |
| 外埠                    | 2.96±0.35               |        |       |
| 户籍类型                  |                         |        |       |
| 农业户                   | 2.93±0.38               | -1.989 | 0.048 |
| 非农业户                  | 2.78±0.42               |        |       |
| 居住方式                  |                         |        |       |
| 养老机构                  | 2.63±0.41               | -3.508 | 0.001 |
| 独居或与他人共同居住            | 2.86±0.41               |        |       |
| 子女回家看望频率(周/次)         |                         |        |       |
| <1                    | 2.75±0.39               | 1.798  | 0.168 |
| 1~4                   | 2.79±0.43               |        |       |
| >4                    | 2.88±0.43               |        |       |
| 主要照顾者                 |                         |        |       |
| 养老院护理员                | 2.65±0.41               | 5.647  | 0.004 |
| 家人                    | 2.85±0.41               |        |       |
| 保姆或无人照顾               | 2.95±0.40               |        |       |
| 经济来源                  |                         |        |       |
| 自己工资                  | 2.76±0.40               | -3.134 | 0.002 |
| 政府救助、子女赡养费及其他         | 2.97±0.44               |        |       |
| 医疗费用支付方式              |                         |        |       |
| 城镇职工基本医疗保险            | 2.74±0.43               | 3.361  | 0.037 |
| 城镇居民基本医疗保险            | 2.84±0.41               |        |       |
| 新型农村合作医疗保险及其他         | 2.95±0.35               |        |       |
| 医疗保险月自付投入(元/月)        |                         |        |       |
| 0~500                 | 2.86±0.37               | 1.976  | 0.119 |
| 501~1 000             | 2.81±0.51               |        |       |
| 1 001~2 000           | 2.73±0.38               |        |       |
| >2 000                | 2.64±0.46               |        |       |
| 居民医疗费用负担超过40%         |                         |        |       |
| 否                     | 2.70±0.38               | -2.368 | 0.019 |
| 是                     | 2.85±0.43               |        |       |
| 如医疗保险不报销是否需专业护理人员上门服务 |                         |        |       |
| 是                     | 3.07±0.40               | -3.106 | 0.001 |
| 否                     | 2.68±0.37               |        |       |
| 失能程度                  |                         |        |       |
| 轻中度                   | 2.78±0.36               | 2.305  | 0.131 |
| 重度                    | 2.87±0.53               |        |       |
| 慢性病患病数量(n)            |                         |        |       |
| ≤1                    | 2.67±0.33               | 1.568  | 0.211 |
| 2                     | 2.83±0.41               |        |       |
| ≥3                    | 2.82±0.46               |        |       |

表6 失能老人整合性照护服务内容需求影响因素的自变量赋值方式

| 项目                    | 赋值方式                                                  |
|-----------------------|-------------------------------------------------------|
| 性别                    | 男性=0;女性=1                                             |
| 长期居住城市                | 北京=0;外埠=1                                             |
| 户籍类型                  | 非农业户=0;农业户=1                                          |
| 居住方式                  | 养老机构=0;独居或与他人共同居住=1                                   |
| 子女回家看望频率(周/次)         | <1=1;1~4=2;>4=3                                       |
| 主要照顾者                 | 养老院护理员=1,0,0;家人=0,1,0;保姆或无人照顾=0,0,1                   |
| 经济来源                  | 自己工资=0;政府救助、子女赡养费及其他=1                                |
| 医疗费用支付方式              | 城镇职业基本医疗保险=1,0,0;城镇居民基本医疗保险=0,1,0;新型农村合作医疗保险及其他=0,0,1 |
| 医疗保险自付投入(元/月)         | 0~500=1;501~1 000=2;1 001~2 000=3;>2 000=4            |
| 居民医疗费用负担超过40%         | 否=0;是=1                                               |
| 如医疗保险不报销是否需专业护理人员上门服务 | 否=0;是=1                                               |
| 失能程度                  | 轻中度失能=0;重度失能=1                                        |

表7 失能老人整合性照护服务内容需求影响因素的多元线性回归分析结果

| 项目                   | B 值   | SE 值  | β 值   | t 值   | P 值   |
|----------------------|-------|-------|-------|-------|-------|
| 常数项                  | 0.858 | 0.213 | -     | 4.036 | 0.001 |
| 居住方式                 | 0.281 | 0.061 | 0.294 | 4.589 | 0.001 |
| 经济来源                 | 0.216 | 0.058 | 0.219 | 3.738 | 0.001 |
| 医疗保险月自付投入            | 0.066 | 0.025 | 0.158 | 2.667 | 0.008 |
| 居民医疗费用负担超过40%        | 0.140 | 0.054 | 0.156 | 2.618 | 0.010 |
| 如医疗保险不报销仍需专业护理人员上门服务 | 0.348 | 0.053 | 0.384 | 6.583 | 0.001 |
| 失能程度                 | 0.228 | 0.058 | 0.249 | 3.927 | 0.001 |

注:R=0.602;R<sup>2</sup>=0.362;F=18.058;P=0.001

照护需求是精神慰藉需求,与王伯彦<sup>[27]</sup>研究结果一致。可能是受中国传统文化的影响,失能老人在表达感情方面比较含蓄内敛,不习惯同别人倾诉自己的心理感受、获取他人的精神支持,因而精神慰藉需求较低<sup>[28]</sup>。因此,在制订整合性照护服务具体内容时,需要评估失能老人的慢性病情况,根据其病情需求提供与疾病相关的个体化的整合性照护服务,并着重提供与该慢性病相关的基础护理、专科护理和健康教育。

### 3.3 失能老人整合性照护需求的影响因素分析

**3.3.1 居住方式** 本研究结果发现,独居或与他人共同居住的失能老人整合性照护需求比居住在养老机构的老人高。与相关研究结果<sup>[29]</sup>基本一致。分析原因:相较于养老机构专业的医疗照护团队,独居和与他人同住的失能老人主要由自己或他人照顾,照护专业性不强,无法完全满足失能老人全方位的照护需求,因此对整合性照护需求高<sup>[29]</sup>。因此,在设立整合性照护服务的准入条件时,应优先关注与他人共同居住或独居的失能老人,优先满足他们的照护需求。

**3.3.2 经济来源、医疗保险月自付投入和医疗费用负担超过40%** 本研究结果发现,经济来源非自己工资的失能老人(依赖政府救助、子女赡养费等养老),医疗保险月自付投入较低、医疗费用负担超过40%的失能老人,整合性照护需求高。原因可能是:①医疗费用来源非自己工资的失能老人,整合性照护需求高,与宋平等<sup>[29]</sup>研究结果一致。本研究中86.36%的失能老人患有2种及以上的慢性病,慢性病的长期治疗和

康复需要较高的费用。微薄的政府救助可能不足以支撑老人的日常生活和治疗费用。依靠子女赡养费养老的失能老人,高昂的治疗和康复费用也会造成较大的经济压力,经济压力较大的老人,往往健康状况较差,需要更多的健康照护,因此照护需求高<sup>[30-32]</sup>。

②医疗保险月自付投入较低的失能老人,整合性照护需求高。目前未有类似研究报道医疗保险月自付投入与照护需求之间的关系。分析原因:医疗保险月自付投入较低,表明医疗保险报销比例较高,可能与老人退休前职位级别较高有关<sup>[32]</sup>。他们通常文化水平和经济地位都比较高,对健康的关注度也比较高,愿意并且有能力购买服务,因而整合性照护需求高。③医疗费用负担超过40%的失能老人整合性照护需求高。张馨月和陈长香<sup>[32]</sup>研究也表明,医疗负担越重的老人日常照护需求越高。医疗费用负担越重,表明失能老人健康状况越差,所需要的医疗干预和照护越多,因而照护需求高。因此,设定整合性照护服务的收费标准时,应调研失能老人的承受额度。建议社区整合性照护服务作为公益性、非盈利的服务,失能老人的费用支付仅作为整合性照护服务的收入来源之一。整合性照护服务的收益还需要依赖政府补贴、企业资助,以减轻失能老人的医疗费用负担。

**3.3.3 如医疗保险不报销仍需专业护理人员上门服务** 本研究结果发现,如医疗保险不报销仍需专业护理人员上门服务的失能老人整合性照护需求高。与武佳琳等<sup>[33]</sup>研究结果一致。这恰恰反映了其对照护的强烈需求,无论报销与否,都希望通过整合性照护服务解决居家自理困境,提示亟需构建整合性照护服务体系,以满足失能老人的迫切需求。

**3.3.4 失能程度** 本研究结果发现,失能程度越重,整合性照护需求越高。与赵旻等<sup>[34]</sup>研究结果一致。失能程度越重,即自理能力越差,所需的照护与实际接受照护也越多<sup>[35]</sup>。提示政府在设立整合性照护服务时,以失能程度为依据之一,应优先考虑失能程度较重的老人,缓解他们的养老困境。

#### 4 小结

综上所述,社区尚未开展整合性照护服务,已开展的照护服务以生活护理为主。失能老人对整合性照护服务需求较高,居住方式、经济来源、医疗保险月自付投入、医疗费用负担超过40%、医疗保险不报销居家护理上门服务的意愿和失能程度是整合性照护服务内容需求的影响因素。建议政府在设立整合性照护服务时,应以失能程度为依据之一,优先考虑独居或与他人共同居住的、经济来源非自己工资的、医疗保险月自付投入较低的、医疗费用负担超过40%的、有照护刚需的失能老人。本研究尚存在一定局限性,未实地考察社区是否提供整合性照护服务,而是通过调研老人实际接受的社区照护服务来评估,与真实结果可能存在偏差。今后将进一步采用实地考察法客观评估社区是否提供整合性照护服务,本研究考虑到住院患者多不了解社区照护现状,因此选取56例社区老人调查整合性照护现状,未选取全部的198例老人。此方法虽然避免了混杂因素对结果的影响,但在一定程度上影响了整合性照护服务现状和需求结果的匹配度。本研究仅调研了北京地区的情况,对其他城市的借鉴意义有待进一步研究。

**利益冲突声明:**本文所有作者均声明不存在利益冲突。

#### 参考文献:

[1] 中华人民共和国国家卫生健康委员会.国家卫生健康委员会2019年5月8日例行新闻发布会介绍全国护理工作发展情况[EB/OL].(2019-05-08)[2021-08-27].<http://www.nhc.gov.cn/xwzb/webcontroller.do?titleSeq=11159&gectype=1>.

[2] 中华人民共和国民政部.民政部关于完善失能半失能老人照护制度的提案答复的函[EB/OL].(2018-09-21)[2021-08-27].<http://www.mca.gov.cn/article/gk/jytabljgk/zxwyt/201811/20181100013085.shtml>.

[3] 牛田郡.山西省老年人长期照护问题研究[D].太原:山西财经大学,2017.

[4] 于梦璐.个案管理视角下养老机构整合照护服务探究——以上海市H社会福利院重度照护老人服务为例[D].上海:上海师范大学,2019.

[5] 王丹.整合照料理念下社区卫生服务中心托老科养老服务评价的初步研究[D].重庆:解放军陆军军医大学,2017.

[6] 王懿范,邱文达.医疗与长照整合[M].台北:五南图书出版股份有限公司,2016:25.

[7] 彭雪婷,魏琳,张小培,等.老年人居家整合性照顾服务内容体系的构建[J].中国实用护理杂志,2019,35(20):1526-1532.DOI:10.3760/cma.j.issn.1672-7088.2019.20.002.

[8] FRANCES B, CLAIREI G, JILL M, et al. Supporting shared decision-making for older people with multiple health and social care needs: a protocol for a realist synthesis to inform

integrated care models [J]. BMJ Open, 2017, 7(2): e014026. DOI: 10.1136/bmjopen-2016-014026.

[9] 谢佳洁.基于使用后评价的社区养老模块设计与研究——以常州369整合照护中心为例[D].徐州:中国矿业大学,2018.

[10] 李琴,杨标,陈娅楠,等.宁夏农村慢病家庭灾难性卫生支出及其影响因素分析[J].宁夏医科大学学报,2020,42(8):805-809. DOI: 10.16050/j.cnki.issn.1674-6309.2020.08.010.

[11] 曹培叶.护理院失能老年人长期照护需求评估量表的编制与初步应用研究[D].重庆:重庆医科大学,2018.

[12] 张娟.居家失能老年人长期护理需求调查及现状分析[D].江苏:苏州大学,2018.

[13] 彭培培.失能老人照护需求及质量评价体系构建研究[D].北京:解放军总医院军医进修学院,2015.

[14] 伟松.“整合照料”理念下社区养老服务政策研究[D].重庆:西南大学,2019.

[15] 王洋,王西鸽,刘宇飞,等.长春市社区老年人居家养老服务需求与满足现状调查研究[J].中国护理管理,2016,16(3):389-391. DOI: 10.3969/j.issn.1672-1756.2016.03.026.

[16] 饶东,张玲娟,陈文瑶,等.老年人居家长期照护服务项目体系构建及风险评价[J].护理学杂志,2019,34(4):85-89. DOI: 10.3870/j.issn.1001-4152.2019.04.085.

[17] 颜永阳,邓俊,孙宏玉.慢性病患者对“互联网+护理服务”认知和需求研究[J].护理管理杂志,2020,20(11):803-808. DOI: 10.3969/j.issn.1671-315x.2020.11.010.

[18] 左扬萍,宋艳平,彭晶晶,等.社区卫生服务机构开展居家养老医疗服务面临的问题及对策研究[J].全科护理,2020,18(24):3141-3145. DOI: 10.12104/j.issn.1674-4748.2020.24.011.

[19] 景雪冰,李艳,韩庆坤,等.临床护士对医护到家服务参与意愿及影响因素的研究[J].护理管理杂志,2019,19(11):777-779. DOI: 10.3969/j.issn.1671-315x.2019.11.004.

[20] 黄文杰,戴丽,胡永国,等.重庆城市社区整合照料式养老服务模式接受度调查研究[J].西南师范大学学报(自然科学版),2017,42(12):154-161. DOI: 10.13718/j.cnki.xsxb.2017.12.025.

[21] 张洪,张文广,王位琼,等.社区中老年居民养老护理服务的需求调查[J].护理学杂志,2018,33(16):90-92. DOI: 10.3870/j.issn.1001-4152.2018.16.090.

[22] 吴芳琴,范环,肖树芹,等.北京市社区失能老年人的照护需求及其影响因素[J].中华护理杂志,2018,53(7):841-845. DOI: 10.3761/j.issn.0254-1769.2018.07.015.

[23] 闫伟,何梦娇,路云,等.基于CLHLS的我国老年人失能现状及其影响因素研究[J].护理研究,2021,35(10):1807-1811. DOI: 10.12102/j.issn.1009-6493.2021.10.021.

(下转第565页)

- issn.1001-8131.2016.01.009.
- [16] 沈志娟,杨园园.二胎高龄孕产妇妊娠结局研究[J].护理管理杂志,2020,20(3):153-156.DOI:10.3969/j.issn.1671-315x.2020.03.001.
- [17] 王秋静,沈苏桃,潘慧敏,等.初产妇阴道分娩产程评估研究进展[J].中国性科学,2021,30(4):49-51.DOI:10.3969/j.issn.1672-1993.2021.04.016.
- [18] LITTLE S E, ROBINSON J N, ZERA C A. Changes in delivery timing for high-risk pregnancies in the United States[J]. American Journal of Perinatology, 2021, 8(13): 1373-1379. DOI: 10.1055/s-0040-1712965.
- [19] 沈蓓蓓,林启萍,毛丽萍,等.联合运用爱丁堡产后抑郁量表和产后抑郁筛查量表筛查研究高危妊娠孕妇产后抑郁状况[J].中国实用护理杂志,2018,34(26):2031-2034.DOI:10.3760/cma.j.issn.1672-7088.2018.26.007.
- [20] 胡颖,周明芳,万艳平.孕妇孕晚期分娩恐惧现状及影响因素研究[J].护理管理杂志,2020,20(11):768-773. DOI:10.3969/j.issn.1671-315x.2020.11.002.
- [21] SHOJAEIAN Z, KHADIVZADEH T, SAHEBI A, et al. Perceived risk in women with high risk pregnancy: a qualitative study[J]. Iranian Journal of Nursing Midwifery Research, 2021, 26(2): 168-174. DOI: 10.4103/ijnmr.IJNMR\_32\_20.
- [22] 肖菊兰,高源敏,陈瑜,等.孕产妇围生期抑郁情绪及影响因素的纵向研究[J].护理学杂志,2021,36(7):90-93. DOI:10.3870/j.issn.1001-4152.2021.07.090.
- [23] 肖苏琴,方艳春,刘芬,等.中心群组化孕期保健模式对初产妇分娩恐惧及妊娠结局的影响[J].中华现代护理杂志,2021,27(1):11-16. DOI:10.3760/cma.j.cn115682-20200422-02950.
- [24] 于长莉,吴小燕.助产士心理干预对自然分娩结局及产妇情绪的影响[J].循证护理,2018,4(11):1000-1002. DOI:10.12102/j.issn.2095-8668.2018.11.010.
- [25] 卢婧.北京市危重孕产妇救治网络运行现状研究[D].北京:北京协和医学院,2021.
- [26] EDWARDS K, IMPEY L. Extreme preterm birth in the right place: a quality improvement project[J]. Archives of Disease in Childhood - Fetal and Neonatal Edition, 2020, 105(4): 445-448. DOI: 10.1136/archdischild-2019-317741.
- (收稿日期:2022-05-20;修回日期:2022-06-20)  
(本文编辑:张 岚,梁瑛琳)

引用本文:孙秀艳,刘柳,姜文,等.宫内转诊高危妊娠孕产妇风险管理及临床效果研究[J].护理管理杂志,2022,22(8):560-565. DOI:10.3969/j.issn.1671-315x.2022.08.006.

(上接第549页)

- [24] 杨希,张河川.老年人长期照护用药安全研究现状[J].护理研究,2020,34(11):1993-1996. DOI:10.12102/j.issn.1009-6493.2020.11.025.
- [25] DIAS B M, SANTOS F S D, REIS A M M. Potential drug interactions in drug therapy prescribed for older adults at hospital discharge: cross-sectional study[J]. Sao Paulo Medical Journal, 2019, 137(4): 369-378. DOI: 10.1590/1516-3180.2019.013405072019.
- [26] 罗俏玲,岑慧红,陈沁.城市社区老年 COPD 病人健康教育内容需求调查分析[J].全科护理,2017,15(12):1423-1426. DOI:10.3969/j.issn.1674-4748.2017.012.005.
- [27] 王伯彦.居家失能老人长期照护服务需求及其影响因素研究[D].太原:山西财经大学,2021.
- [28] 徐朝松.农村空巢老人精神赡养问题研究——以湖南省新晃县为例[D].贵阳:贵州大学,2015.
- [29] 宋平,刘晓颖,刘小溪,等.社区失能老年人长期照护需求的调查研究[J].护理研究,2019,33(3):381-385.10.12102/j.issn.1009-6493.2019.03.004.
- [30] 陈申,郑静,陈晨,等.居家失能老人未满足的日常生活活动需求与照顾者照顾能力的相关性[J].中国老年学杂志,2019,39(6):1482-1486.
- [31] 王琼.城市社区居家养老服务需求及其影响因素——基于全国性的城市老年人口调查数据[J].人口研究,2016,40(1):98-112.
- [32] 张馨月,陈长香.影响高龄老人日常生活照护和精神慰藉需求的经济地位分析[J].华北理工大学学报(医学版),2021,23(1):46-49. DOI:10.19539/j.cnki.2095-2694.2021.01.010.
- [33] 武佳琳,王君俏,陆美玲,等.居家高龄老年人照护需求及满足情况调查[J].护理学杂志,2013,28(12):89-91.
- [34] 赵旻,王亚楠,姜亚芳.医养结合背景下社区老年人居家护理服务需求现状调查研究[J].护理管理杂志,2020,20(8):540-543. DOI:10.3969/j.issn.1671-315x.2020.08.002.
- [35] 李蒙蒙,杨黎.失能老年人长期照护需求及其影响因素研究进展[J].护理研究,2017,31(20):2440-2443. DOI:10.3969/j.issn.1009-6493.2017.20.003.
- (收稿日期:2022-02-19;修回日期:2022-06-12)  
(本文编辑:刘晓联)

引用本文:陈海荣,高学莉,刘溢思.失能老人整合性照护现状及需求的影响因素研究[J].护理管理杂志,2022,22(8):544-549. DOI:10.3969/j.issn.1671-315x.2022.08.003.
