# Supplementary material
Source: Research Square preprint supplement (doi:10.21203/rs.3.rs-9212443/v1)
Supplement: Supplementary file 2 [file e8df30d75c8852bf42698787.docx]

Dear Participant,

This questionnaire aims to collect your basic information, health status, and the allocation of care resources in your nursing home. All data will be used **only for research purposes** and kept strictly confidential. Please answer according to your actual situation. Thank you for your cooperation!

I. Sociodemographic Characteristics

1. Gender

☐ Male ☐ Female

1. Age

☐ 60–69 years ☐ 70–79 years ☐ 80–89 years ☐ 90 years and above

1. Ethnicity

☐ Han ☐ Ethnic minority: __________

1. Marital status

☐ Married ☐ Single ☐ Divorced ☐ Widowed

1. Length of hospital stay

☐ Less than 1 week ☐ 1–2 weeks ☐ 2 weeks–1 month ☐ More than 1 month

1. Type of nursing home

☐ Public nursing home ☐ Private nursing home ☐ Public institution operated privately

☐ Community-embedded elderly care facility

II. Clinical Health Information

1. Degree of ADL (Activities of Daily Living) impairment

☐ No impairment (fully independent)

☐ Mild impairment (partially needs assistance)

☐ Moderate impairment (mostly needs assistance)

☐ Severe impairment (fully dependent)

1. Mobility status

☐ Able to walk independently

☐ Needs assistive devices to walk

☐ Unable to walk (bedridden / wheelchair-bound)

1. Number of chronic diseases

☐ No chronic disease ☐ 1 ☐ 2 ☐ 3 or more

1. Hearing status

☐ Normal (can communicate without assistance)

☐ Mild impairment (occasional repetition needed)

☐ Moderate impairment (requires hearing aid)

☐ Severe impairment (almost unable to hear)

1. Vision status

☐ Normal (can see clearly without assistance)

☐ Mild impairment (occasional blurriness)

☐ Moderate impairment (requires glasses / magnifier)

☐ Severe impairment (almost unable to see)

III. Assessment of Care Resources Related to Long-Term Care Funds

1. Does your nursing home provide **comprehensive care services**?

☐ Yes ☐ No

(Comprehensive care includes: daily care, medical care, rehabilitation care, psychological support, health management, etc.)

1. Categories of professionals currently providing you with professional care services (multiple answers allowed)

☐ Registered nurse ☐ Rehabilitation therapist ☐ Dietitian ☐ Psychological counselor

☐ Physician ☐ Nursing aide ☐ Others: __________
